# Supplementary material for: Extracellular Neuroglobin as a Stress-Induced Factor Activating Pre-Adaptation Mechanisms against Oxidative Stress and Chemotherapy-Induced Cell Death in Breast Cancer
Source: MDPI journal article supplement (doi:10.3390/cancers12092451), 2020-08-29
Supplement: s1 [file s1]

# Supplementary Material: Extracellular Neuroglobin as a Stress-Induced Factor Activating Pre-Adaptation Mechanisms Against Oxidative Stress and Chemotherapy-Induced Cell Death in Breast Cancer

Marco Fiocchetti, Virginia Solar Fernandez, Marco Segatto, Stefano Leone, Paolo Cercola, Annalisa Massari, Francesco Cavaliere and Maria Marino

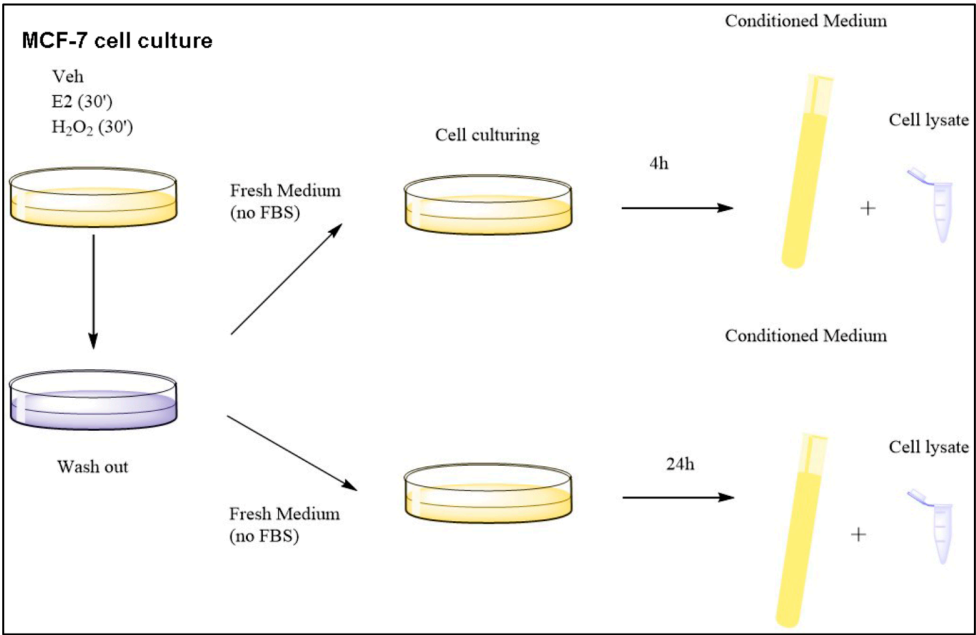

**Figure S1.** Graphic representation of experimental protocol for the generation of conditioned media (for details see Section 4).

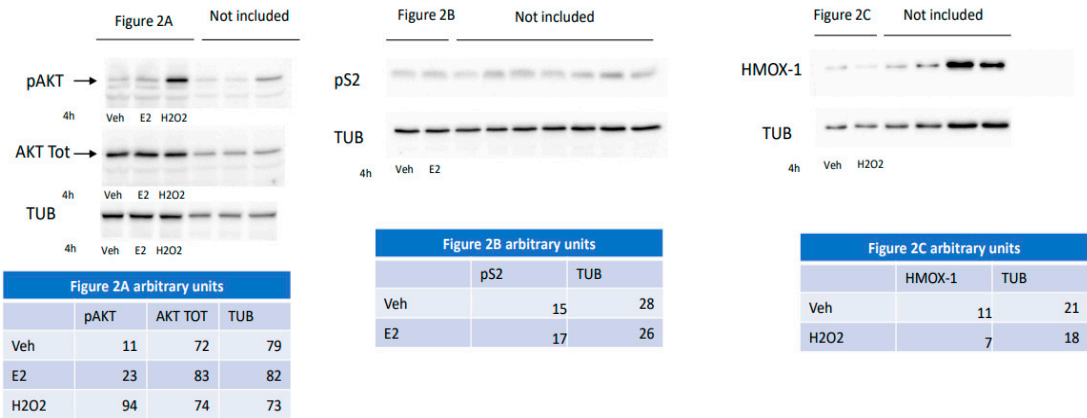

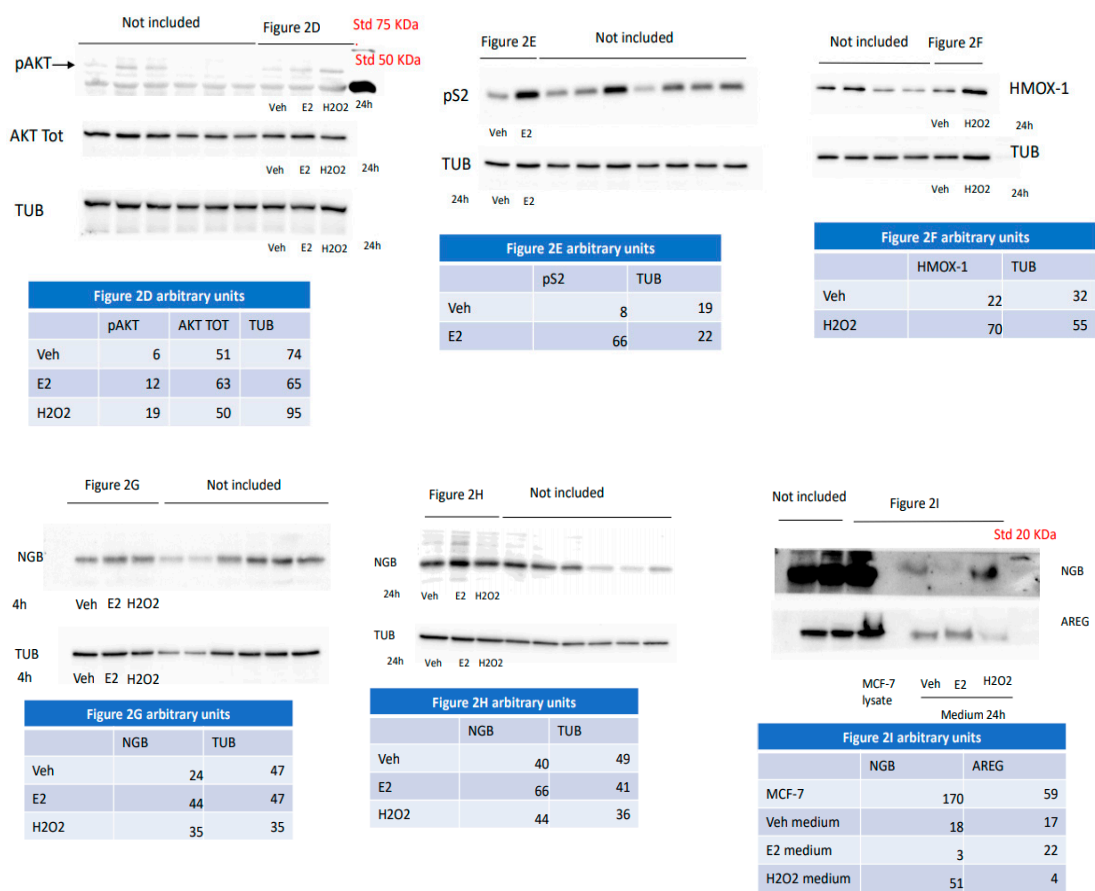

Figure S2. Whole blots images from Figure 2.

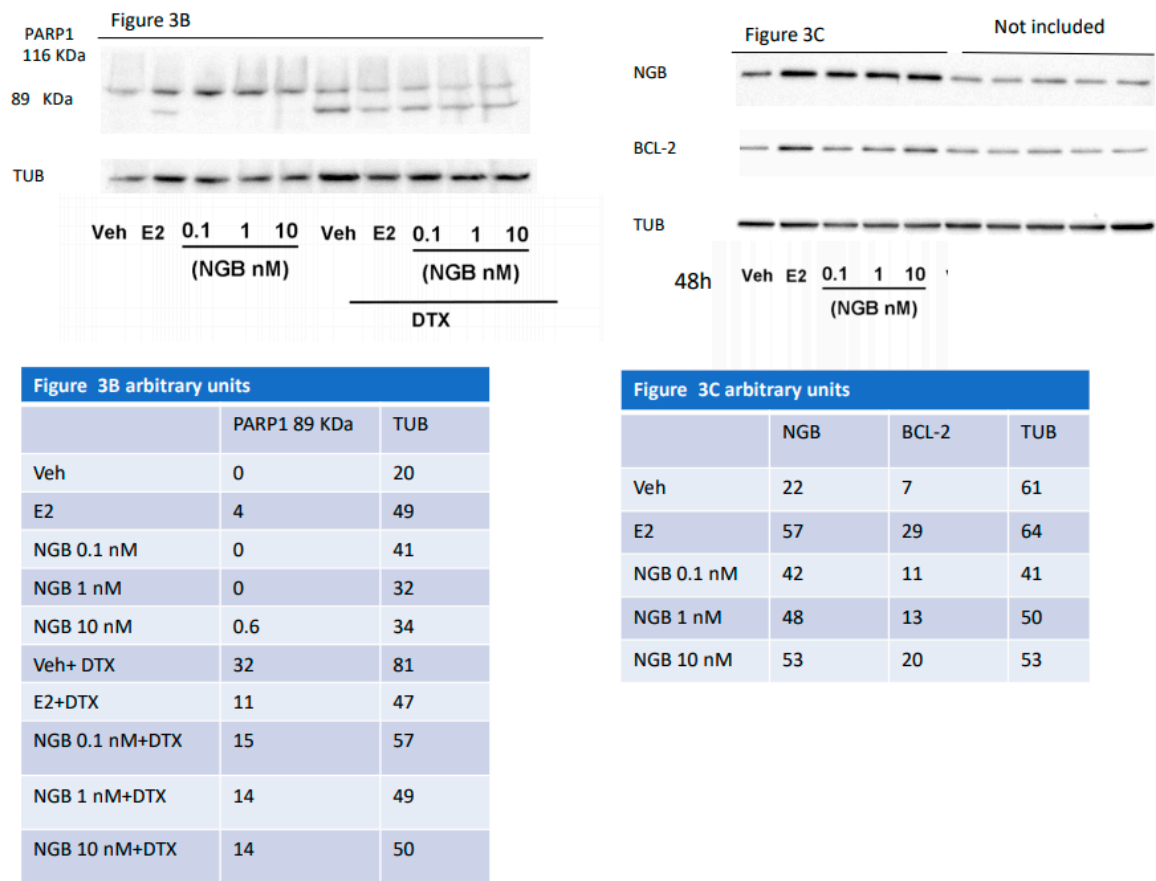

Figure 3. Whole blots images from Figure 3B,C.

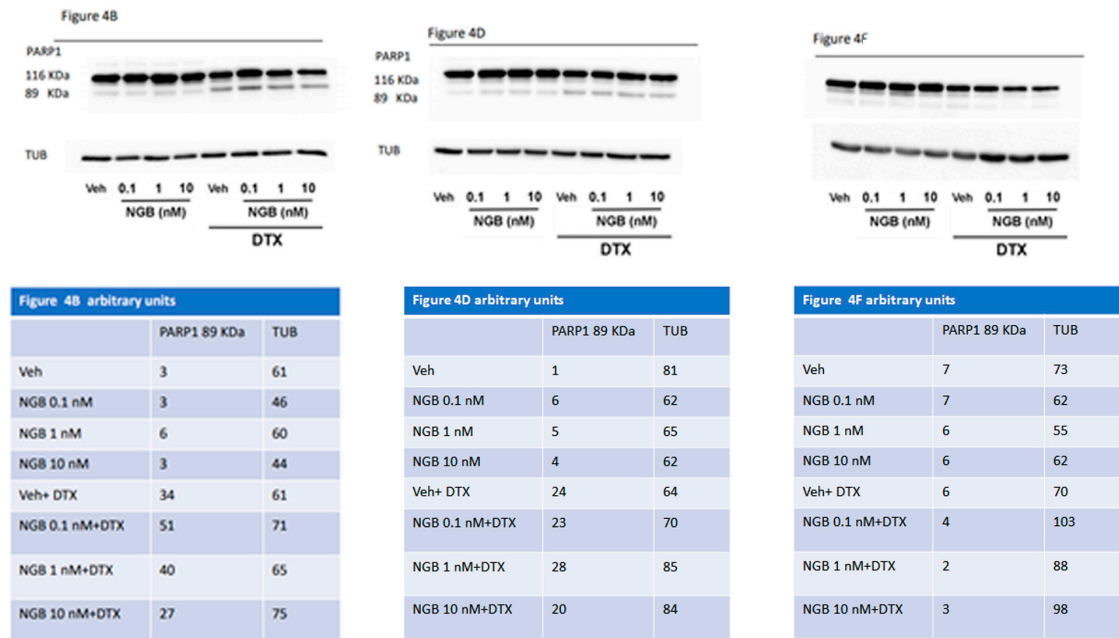

Figure S4. Whole blots images from Figure 4B,D,F.

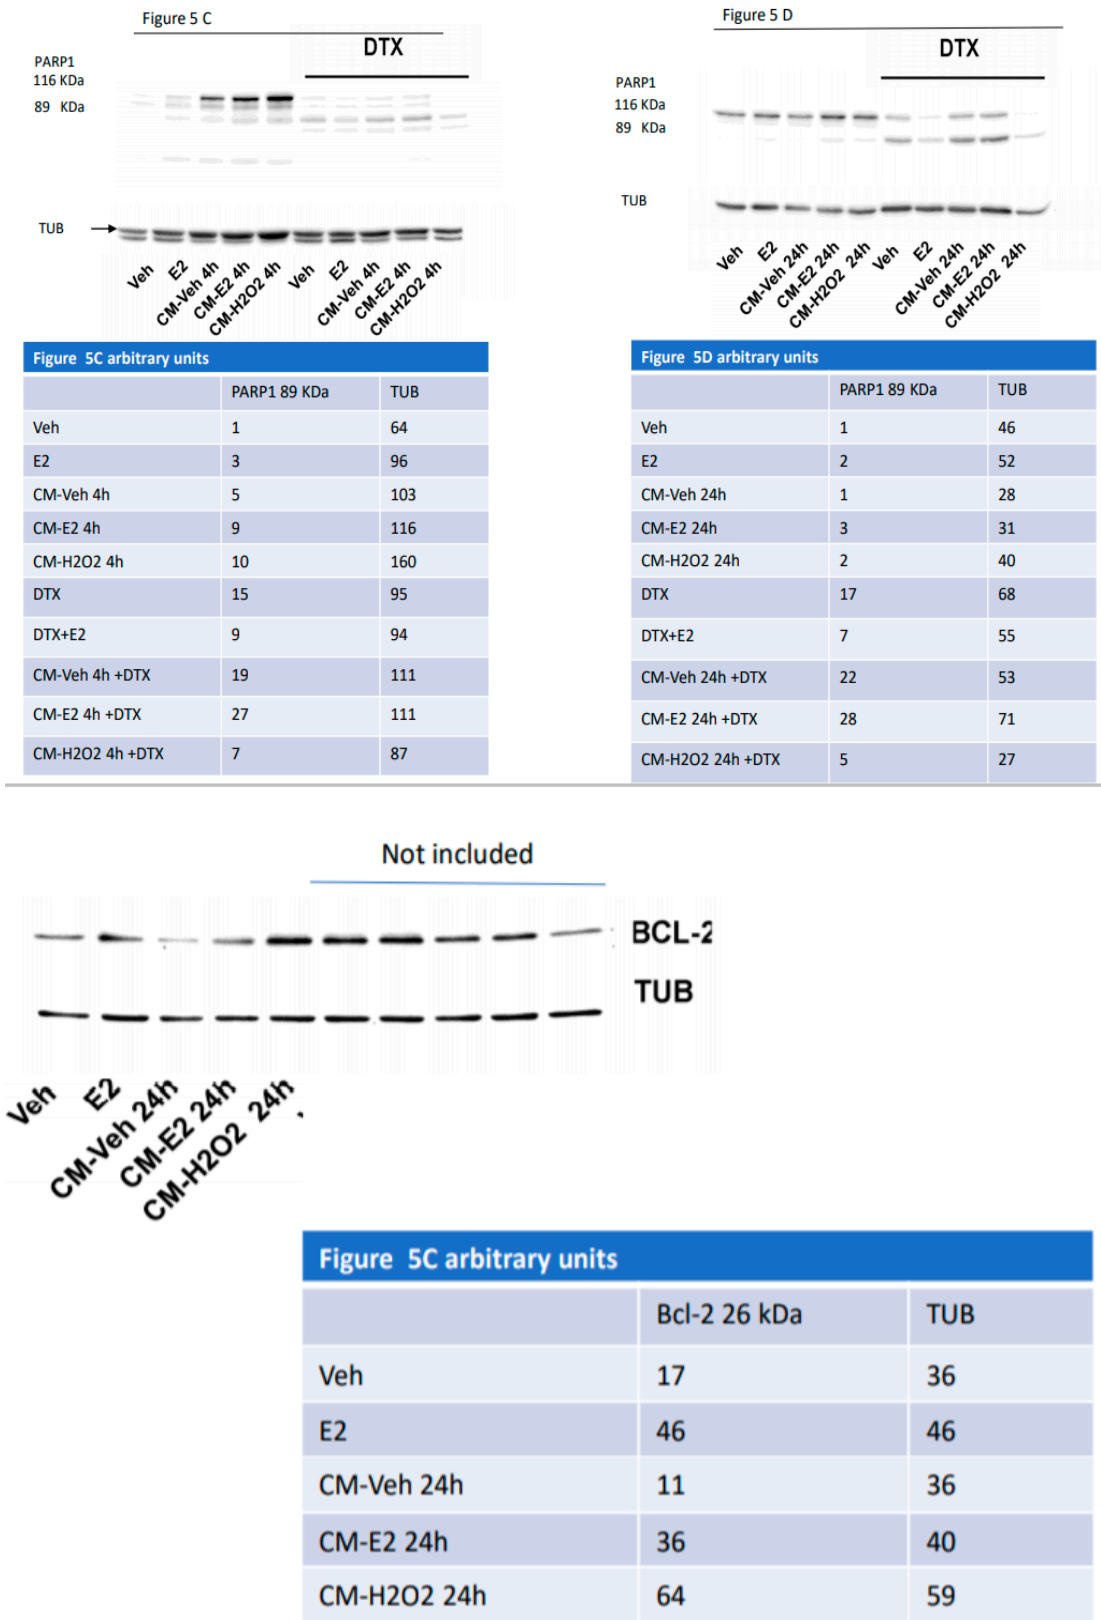

Figure S5. Whole blots images from Figure 5C,D,G.
